# Supplementary material
Source: Springer Nature journal article supplement (https://www.springermedizin.de/resource/supplementary/12884_2007_2_MOESM2_ESM.pdf/9459754)

Percentage of women with at least 1 ANC visit (bars)

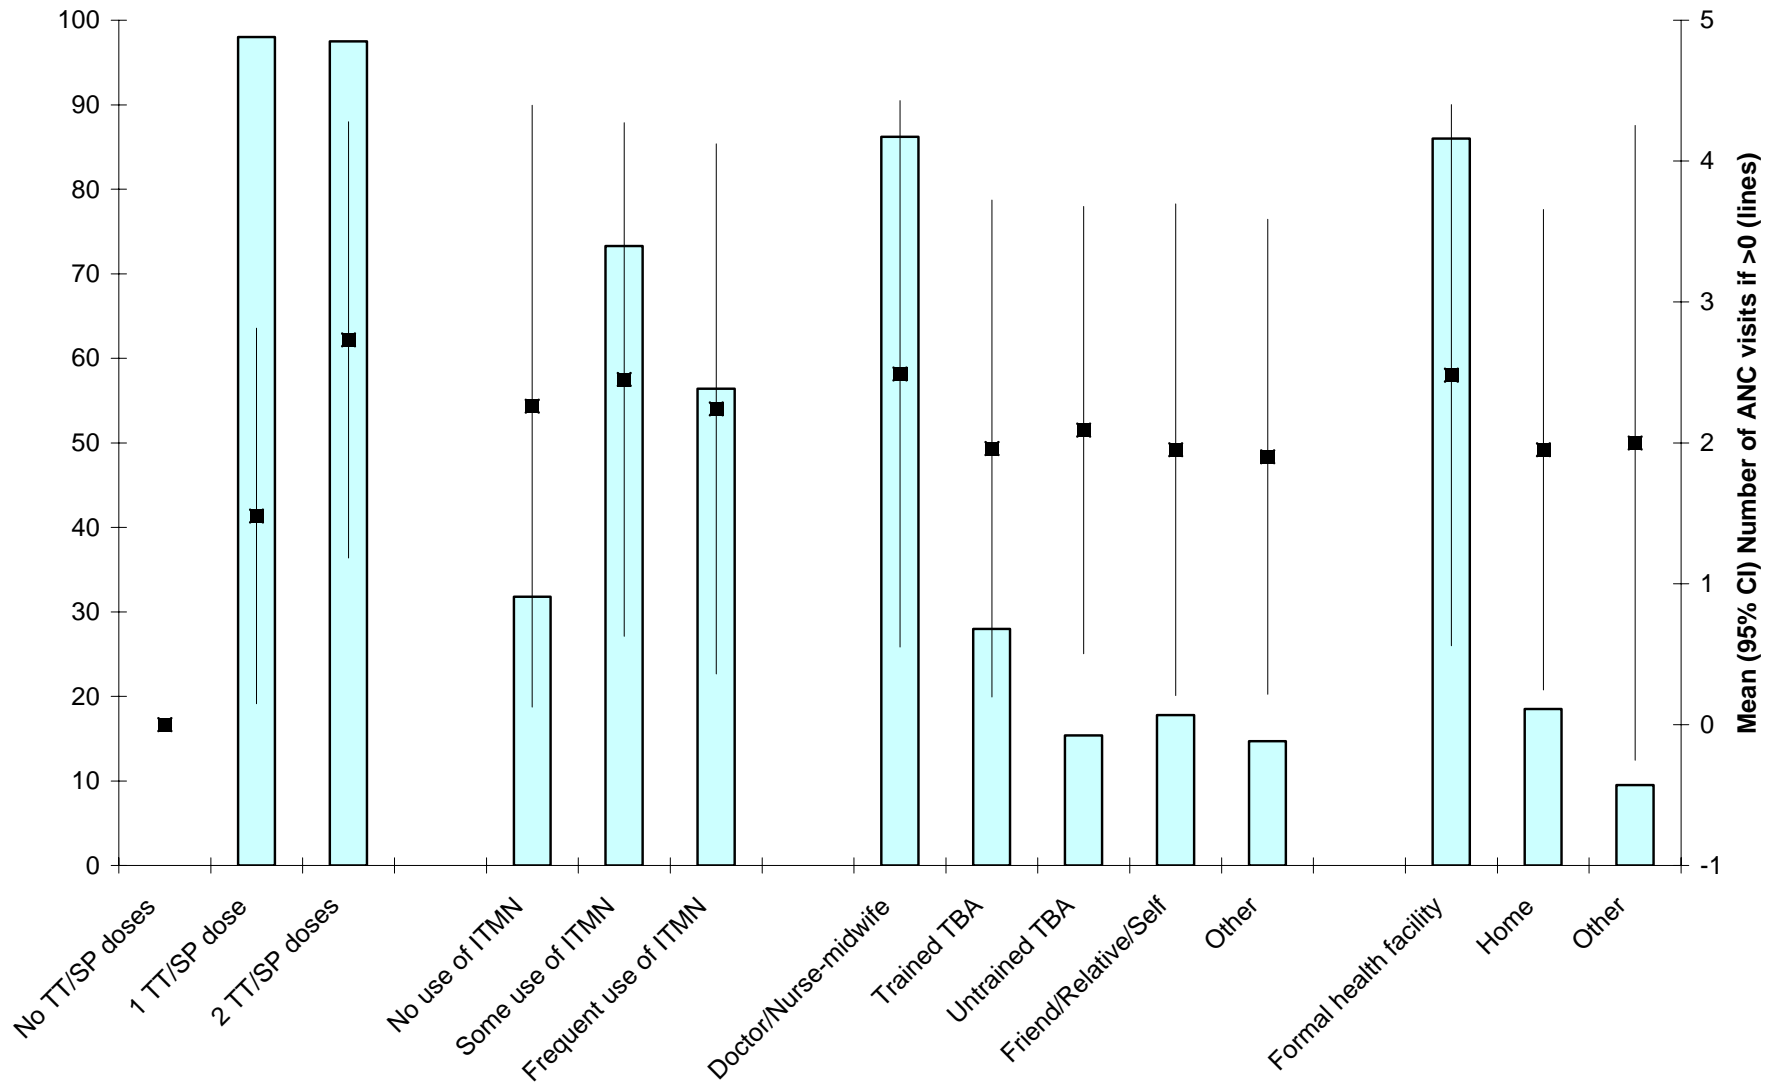

Supplement: MOESM2 [file 9459754]
